1      Feedbacks between size and density determine rapid eco-phenotypic dynamics

2

3

4

5

6

7

8

9

10

11

12

13

14

15

16

17

18

19

20

21

22

23

24 ABSTRACT

25 1. Body size is a fundamental trait linked to many ecological processes—from individuals to  
26 ecosystems. Although the effects of body size on metabolism are well-known, the potential  
27 reciprocal effects of body size and density are less clear. Specifically, 1) whether changes in  
28 body size or density more strongly influence the other and 2) whether coupled rapid changes in  
29 body size and density are due to plasticity, rapid evolutionary change, or a combination of both.

30

31 2. Here, we address these two issues by experimentally tracking population density and mean  
32 body size in the protist *Tetrahymena pyriformis* as it grows from low density to carrying  
33 capacity. We then use *Convergent Cross Mapping* time series analyses to infer the direction,  
34 magnitude, and causality of the link between body size and ecological dynamics. We confirm the  
35 results of our analysis by experimentally manipulating body size and density while keeping the  
36 other constant. Last, we fit mathematical models to our experimental time series that account for  
37 purely plastic change in body size, rapid evolution in size, or a combination of both, to gain  
38 insight into the processes that most likely explain the observed dynamics.

39

40 3. Our results indicate that changes in body size more strongly influence changes in density than  
41 the other way around, but also show that there is reciprocity in this effect (i.e., a *feedback*). We  
42 show that a model that only accounts for purely plastic change in size most parsimoniously  
43 explains observed, coupled phenotypic and ecological dynamics.

44

45 4. Together, these results suggest 1) that body size can shift dramatically through plasticity, well  
46 within ecological timescales, 2) that rapid changes in body size may have a larger effect on  
47 ecological dynamics than the reverse, but 3) phenotypic and ecological dynamics influence each  
48 as populations grow. Overall, we show that rapid plastic changes in functional traits like body  
49 size may play a fundamental –but currently unrecognized– role in familiar ecological processes  
50 such as logistic population growth.

51

52

53

54

55

56

57

58

59

60

61

62

63

64

65

66

67

68

69

Key Words: Plasticity, Eco-evolutionary Dynamics, Traits, Phenotypes, Phenotypic change

## 63 INTRODUCTION

64           Body size influences organismal energetic demands (Gillooly *et al.* 2001; Brown *et al.*  
65 2004), diet breadth (Wasserman & Mitter 1978; Gravel *et al.* 2013), the strength of ecological  
66 interactions (Berlow *et al.* 2009), trophic cascades (DeLong *et al.* 2015), and food web structure  
67 (Brose *et al.* 2006; Riede *et al.* 2011; Gravel *et al.* 2013; Gibert & DeLong 2014), all of which  
68 have ecosystem-level consequences (Anderson-Teixeira, Vitousek & Brown 2008; Trebilco *et al.*  
69 2013). Because of its myriad ecological consequences—from individuals (e.g., (Glasheen &  
70 McMahon 1996; Hurlbert, Ballantyne IV & Powell 2008; Pavković-Lučić & Kekić 2013)) to  
71 ecosystems (e.g., (Brown *et al.* 2004; Riede *et al.* 2011; Trebilco *et al.* 2013))—body size is one  
72 of the most important functional traits.

73           Body size can fuel or limit population growth through well-known relationships with  
74 demographic parameters like carrying capacity (K) and the intrinsic growth rate (r) (Damuth  
75 1981; Savage *et al.* 2004; DeLong *et al.* 2015). For example, smaller organisms typically  
76 reproduce faster and can reach higher carrying capacities than larger ones, but also have higher  
77 mortality rates, which leads to faster population turnover (e.g., (Huryń & Benke 2007)). As a  
78 consequence, body size often determines how populations grow, and hence, ecological  
79 dynamics. On the flip side, ecological dynamics can themselves influence body size, although  
80 these effects are not well understood. For example, individual size is under physiological  
81 regulatory control (Davidowitz, Roff & Nijhout 2005; Chelini, Delong & Hebets 2019) and  
82 therefore responds to changes in resource levels (Marañón *et al.* 2013). While resource levels can  
83 vary independently of population density (Holt 2008; Fey, Gibert & Siepielski 2019; Nguyen,  
84 Lara-Gutiérrez & Stocker 2020), high density leads to crowding and increasing intra-specific  
85 competition (Gavina *et al.* 2018). Stronger competition in turn reduces resource availability at

86 the individual level, which may result in stunted growth and smaller body sizes (e.g., (Vanni *et*  
87 *al.* 2009)). Consequently, while body size can, and often does, influence ecological dynamics,  
88 ecological dynamics can also influence body size. Which one more strongly influences the other,  
89 however, is not well understood, among other reasons because both population density and body  
90 size can change dramatically over time (DeLong, Hanley & Vasseur 2014; Clements & Ozgul  
91 2016).

92         Due to either natural or sexual selection (Preziosi & Fairbairn 2000; Chelini, Delong &  
93 Hebets 2019), body size can change evolutionarily (Hairston *et al.* 2005; DeLong *et al.* 2016).  
94 For example, predation selects for smaller but faster-growing prey in pitcher plant inquiline  
95 communities (terHorst, Miller & Levitan 2010) and for shorter developmental times that result in  
96 smaller individuals in mayflies (Peckarsky *et al.* 2001). Selection can act on traits rather quickly  
97 (Thompson 1998; Hairston *et al.* 2005) and rapid evolutionary change has been shown to  
98 influence ecological dynamics as they unfold (e.g., (Becks *et al.* 2012; Rudman *et al.* 2018;  
99 Schaffner *et al.* 2019)), while ecological dynamics, in turn, influence the pace and direction of  
100 evolutionary change (e.g., (Cortez 2016; DeLong & Gibert 2016; Frickel, Sieber & Becks 2016;  
101 Gibert & Yeakel 2019)). Therefore, selection imposed by ecological dynamics may influence  
102 body size, whose rapid change can alter ecological dynamics. Because studying rapid  
103 evolutionary change in body size is unfeasible for most organisms, it is unclear how pervasive  
104 these processes are in nature.

105         In addition to evolution, body size can change within generations through plasticity  
106 (David, Legout & Moreteau 2006; Ghosh, Testa & Shingleton 2013; Lafuente, Duneau &  
107 Beldade 2018; Cameron *et al.* 2020). For example, organisms grow in size throughout ontogeny  
108 and the environment often influences those ontogenetic trajectories, leading to plastic variation

109 in body size (Lafuente, Duneau & Beldade 2018; Chelini, Delong & Hebets 2019). Epigenetic  
110 DNA modifications can also result in rapid phenotypic change from one generation to the next in  
111 response to shifts in biotic or abiotic conditions (e.g., maternal effects, (Roach & Wulff 1987;  
112 Galloway & Etterson 2007)). Teasing apart the contributions of plastic and evolutionary  
113 processes on body size has been the subject of great scientific interest (Amarillo-Suarez, Stillwell  
114 & Fox 2011; Walczyńska, Franch-Gras & Serra 2017; Lafuente, Duneau & Beldade 2018;  
115 Yengo *et al.* 2018; Cox *et al.* 2019). However, whether plasticity or evolution more strongly  
116 influences rapid changes in body size, especially when this is coupled to rapidly shifting  
117 ecological dynamics, is not well understood (e.g., (DeLong, Hanley & Vasseur 2014)). Among  
118 other reasons, this is because teasing apart plastic and evolutionary change over short periods of  
119 time is challenging, even when sufficiently long time series are available (Ellner, Geber &  
120 Hairston 2011). As body size mediates ecological interactions and processes, and can change on  
121 ecological timescales, it is important to understand, track, and predict such change.

122 Here, we address these gaps by answering the following questions: 1) Do rapid changes  
123 in body size more strongly influence population dynamics (i.e., changes in density over time), or  
124 do population dynamics more strongly influence changes in body size? and 2) Are observed  
125 changes in body size most consistent with a model of plasticity, rapid evolution, or one that  
126 accounts for both plastic and evolutionary change? To address the first question, we track  
127 changes in the density and average body size of multiple experimental populations of the protist  
128 *Tetrahymena pyriformis*, then use time series analysis to infer causality. In protists, we expect  
129 changes in body size to be at least partly caused by plasticity because reproduction (cell division)  
130 is tightly linked to ontogenetic changes in body size (cells grow then divide when a critical size  
131 is attained). However, *T. pyriformis* also reproduces extremely fast (~4 generations per day) and

132 exhibits wide standing variation in body size (Wieczynski *et al.* 2021), so rapid evolutionary  
133 change is also possible. Therefore, to distinguish the impacts of plasticity and evolution on  
134 changes in body size, we fit alternative mathematical models (Plasticity Model, Eco-  
135 Evolutionary Model, and Plasticity + Eco-Evo Model) to our experimental time series and use  
136 model selection to infer which one best explains our data. Our results show that rapid, purely  
137 plastic changes in body size more strongly influence changes in density than the other way  
138 around, thus suggesting that plastic phenotypic change may be integral to ecological dynamics.

139

## 140 METHODS

### 141 *Microcosm growth assays*

142 We tracked changes in abundance and body size in the protist *Tetrahymena pyriformis* for 14  
143 days. To do so, we set up 6 experimental microcosms in 250 mL autoclaved borosilicate jars  
144 filled with 200 mL of Carolina protist pellet media (1L of autoclaved DI water per pellet)  
145 inoculated with pond bacteria from Duke Forest (Gate 9/Wilbur pond, Lat=36.02°, Long=-  
146 78.99°, Durham, NC) and a wheat seed as a carbon source. Microcosms were initialized at  
147 densities of 10 ind/mL and incubated in temperature (22°C) and humidity-controlled (65%  
148 humidity) growth chambers (Percival AL-22L2, Percival Scientific, Perry, Iowa) on a 12hr  
149 night/day cycle. Densities (ind/mL) and trait dynamics were tracked daily for two weeks through  
150 fluid imaging of 1 mL subsamples of each microcosm (Fig 1a, FlowCam, Fluid Imaging  
151 Technologies, Scarborough, ME, USA). The FlowCam can image particles ranging from 5-10  
152  $\mu\text{m}$  to 2mm in length. Cell images were automatically sorted and measured by the FlowCam's  
153 proprietary software yielding individual-level data on 150k cells over 14 days, giving our  
154 experiment unparalleled insight into how density and body size changed together over the course

155 of this experiment. Using these data, density was quantified as a simple cell count per volume  
156 sampled and body size was quantified as the volume of a spheroid, in  $\mu\text{m}^3$ . Last, we quantified  
157 changes in total biomass, measured as the sum of the mass of all individual cells in a sample (in  
158 grams,  $g$ , obtained by converting protist volumes estimated by the FlowCam from  $\mu\text{m}^3$  to  $\text{cm}^3$   
159 and assuming that the density of protists equals that of water, i.e.,  $1\text{g}/\text{cm}^3$ ). Neither water nor  
160 nutrients were replaced throughout the course of this experiment.

161

### 162 *Time-series analysis*

163 To assess whether change in body size more strongly influenced changes in density, or  
164 vice versa, we used *Convergent Cross Mapping* (or CCM, (Sugihara *et al.* 2012; Rogers *et al.*  
165 2020)) on the density and body size time series. Conceptually, CCM quantifies the degree to  
166 which one time series causally influences another one by estimating how much information of  
167 the one is contained in the other (Takens 1981; Sugihara *et al.* 2012). If a variable X causally  
168 influences another variable Y, but Y does not influence X, Y should contain information about  
169 X, but not the other way around. CCM does that by quantifying whether variable X can be  
170 predicted from the time series of Y (and vice-versa) for subsets of the time series of increasing  
171 length (this procedure is called ‘cross-mapping’). If X more strongly influences changes in Y  
172 than the other way around, it also means Y responds to X more strongly than X responds to Y. If  
173 the effect of X on Y is causal –as opposed to there being simple correlation with an unobserved  
174 variable Z– the ability to predict Y from X should increase with library size, while the error  
175 associated with that prediction should decline. If predictability does not change with library size,  
176 there is correlation, but not causation (e.g., variable X and Y could be responding to a third

177 unobserved variable  $Z$  instead of to each other, leading to spurious correlation between the two,  
178 (Sugihara *et al.* 2012)).

179 To perform the analysis, we used R package `multispatialCCM` v1.0 (Clark *et al.* 2015),  
180 which works on replicated time series. In a nutshell, the procedure operates as follows: first, the  
181 algorithm does state-space reconstruction using ‘delay-embedding’ (Sugihara *et al.* 2012). That  
182 is, it attempts to reconstruct the manifold of the system (i.e., the collection of all states taken by  
183 all variables for all time points) using lagged versions of each variable, one at a time. The  
184 number of lagged versions of each time series needed for this reconstruction is called the  
185 ‘Embedding Dimension’,  $E$  (Sugihara & May 1990; Sugihara *et al.* 2012). A value of  $E$  much  
186 larger than the number of observed variables suggests effects of other non-observed variables on  
187 the dynamics of the system (Sugihara *et al.* 2012). Second, the ‘`multispatialCCM`’ version of the  
188 CCM algorithm takes bootstrap pseudo-replicates ( $n=800$ ) of varying size (i.e., library size,  
189 ranging from  $E$  to  $E*n$ , where  $n$  is the number of replicated time series) across replicates (Clark  
190 *et al.* 2015). Third, it uses those bootstrapped time series to ‘cross-map’, that is, to predict the  
191 values of one state variable based on exponentially weighted values of the reconstructed  
192 manifold of the system using the other state variable (i.e., ‘predicting  $X$  based on information  
193 contained in  $Y$ ’). By quantifying the correlation coefficient (or the *predictability* coefficient) of  
194 the observed and predicted values, CCM produces a measure of how strong of a causal effect one  
195 variable has on the other (Sugihara *et al.* 2012), if such an effect exists and is indeed causal.

196 Multiple previous studies have already shown how well CCM infers causation in  
197 different ecological systems and environmental conditions (Sugihara *et al.* 2012; Clark *et al.*  
198 2015; Karakoç, Clark & Chatzinotas 2020; Kondoh *et al.* 2020; Rogers *et al.* 2020).

199



200 *Experimental manipulations of size and density*

201 In addition to our time series analysis, we experimentally manipulated density and size,  
202 while controlling for the other variable, to assess whether possible effects of size on density and  
203 vice-versa could be detected experimentally.

204 *Experiment 1: effect of density on body size.* To manipulate density while keeping body  
205 size constant, we started 30 microcosms (as detailed in *Microcosm growth assays* subsection)  
206 populated with *T. pyriformis* at an initial density of 10ind/mL, at Day -2. At Day 0, we filtered  
207 half of the volume (100 mL) in 15 of those microcosms using Whatman GF/A filters, which have  
208 a pore size small enough to filter out the protists, but large enough to allow the bacteria protists  
209 feed on to pass through. The original microcosms were then replenished with the filtered water  
210 with bacteria (but no protists). This procedure halved the density of 15 out of the initial 30 jars  
211 (Fig 1b) while keeping the size distribution of *T. pyriformis*, growth medium, and number of  
212 bacteria, the same, in ‘low’ (jars with half filtered, half unfiltered growth medium) and ‘high’  
213 density treatments (jars with unfiltered growth medium).

214 *Experiment 2: effect of body size on density.* To manipulate body size while keeping  
215 density constant, we started 15 microcosms (as described before) at Day -7 (‘Day -7 jars’  
216 henceforth), and another 15 microcosms at Day -2 (‘Day -2 jars’ henceforth). At Day 0, we  
217 removed and filtered, as before, half of the volume (100 mL) in all jars. We then replenished all  
218 jars with filtered medium from jars in the other group, so all jars contained a mixture of equal  
219 parts medium and bacteria (resources) from Day -2 and Day -7 jars (Fig 1c). Simultaneously, we  
220 filtered an additional amount of medium from Day -7 jars to ensure that the cell density in this  
221 group, once all growth medium had been added, matched that of day -2 jars (Fig 1c). This was  
222 done by calculating the volume of growth medium of the original Day -7 jars that needed to be

223 filtered based on the observed density (after manipulation) in Day -2 jars. Because *T. pyriformis*  
224 decays in size as it grows to carrying capacity (Fig 2a, b), Day -7 jars contained, on average,  
225 smaller individuals, Day -2 jars contained relatively larger individuals (Fig 1c), but both groups  
226 had the same population density, medium, and bacterial density (resources).

227         We used the FlowCam to quantify body size and density in Day 0 (the day the  
228 manipulations were made) and Day 2 (i.e., two days later). In both experiments, we expected  
229 density and size to change over time (from Day 0 to Day 2), meaning that statistically speaking,  
230 we expect time to influence both density and size. However, if either size or density influence the  
231 other, we also expect the interaction between time and density (experiment 1), or time and size  
232 (experiment 2), to be significant. In that case, the interaction term indicates by how much a  
233 difference in starting density or size influences the change in the response variable as time  
234 elapses. A large (small) interaction term would indicate a large (small) effect of the initial  
235 difference in either size or density on the response variable. We tested for these interactions  
236 using linear models in R v3.6.1 (R Core Team 2013) with either 1) body size as a response  
237 variable and density, day, and their interaction as predictors (experiment 1) or 2) density as a  
238 response variable and body size, day, and their interaction as predictors (experiment 2). To  
239 compare the effect sizes of density on size, and size on density, we standardized all variables in  
240 R package *effectsize* v0.6.01 (Ben-Shachar, Lüdtke & Makowski 2020) by re-centering and re-  
241 scaling variables to a normal distribution with mean equal to zero and standard deviation equal to  
242 1 (Gelman 2008).

243

244 *Mathematical models*

245 While others have argued that laboratory cultures should have low levels of heritable genetic  
246 variation (DeLong, Hanley & Vasseur 2014), *T. pyriformis* has mechanisms to maintain larger  
247 than expected levels of genetic variation (Dimond & Zufall 2016). Because of this, and to assess  
248 whether observed changes in body size were more likely due to plasticity or rapid evolution, we  
249 fitted two possible models that track change in the abundance and average body size of a  
250 population,  $N$ , as it grows logistically towards a carrying capacity  $K$  with intrinsic growth rate  $r$ .  
251 Following previous work (Abrams 1977; Abreu *et al.* 2019; Lax, Abreu & Gore 2020;  
252 Wieczynski *et al.* 2021), we included an additional mortality term in the ecological dynamics,  
253  $mN$ , to account for regular loss of individuals from the population through sampling. This  
254 additional mortality term has been shown to better describe the ecological dynamics of a  
255 microbial microcosm with frequent sampling, like ours (Abreu *et al.* 2019; Lax, Abreu & Gore  
256 2020). Furthermore, we assumed that the intrinsic growth rate and the carrying capacity were  
257 functions of (average) body size,  $M$ , of the forms  $r = aM^\alpha$  and  $K = bM^\gamma$ , following well-known  
258 allometric relationships (Damuth 1981; Savage *et al.* 2004). Taken together, the ecological  
259 baseline model was thus written as:

$$260 \quad \frac{dN}{dt} = aM^\alpha \left(1 - \frac{N}{bM^\gamma}\right) - mN. \quad \text{eq [1]}$$

261 To incorporate coupling between ecological dynamics (changes in  $N$ ) and both plastic  
262 and evolutionary changes in  $M$ , we used three alternative model formulations to track changes in  
263  $M$ : the first assumed that only plastic change in  $M$  could occur (Plasticity Model), the second  
264 assumed that only evolutionary change in  $M$  could occur (Eco-Evolutionary Model), while the  
265 third allowed both processes to occur simultaneously (Plasticity + Eco-Evo Model).

266 The Plasticity Model modifies the existing Supply-Demand model for body size  
267 dynamics (DeLong 2012; DeLong & Walsh 2015) and assumes that the rate of change in body

268 size,  $\frac{dM}{dt}$ , increases with energy intake (supply), and decreases with energy loss (demand).  
269 Following a recent study (DeLong 2020), we assumed that the supply in a species growing  
270 logistically depends on the ratio of the carrying capacity,  $K$ , and the abundance of the species,  $N$ ,  
271 times a conversion rate constant  $e$ , that converts the supply to units of  $M$ . When the population is  
272 small, the supply approaches infinity, and it approaches  $e$  when  $N$  grows to  $K$ . Following  
273 previous studies (DeLong, Hanley & Vasseur 2014), we also assumed that the demand was the  
274 metabolic cost of the organism, which is known to increase allometrically with body size, as  
275  $cM^\delta$ . Taken together, the equation controlling changes in body size  $M$  was:

$$276 \quad \frac{dM}{dt} = \frac{eK}{N} - cM^\delta. \quad \text{eq [2]}$$

277 For the Eco-Evolutionary Model, we followed previous studies on eco-evolutionary  
278 dynamics (e.g., (Abrams, Harada & Matsuda 1993; Abrams & Matsuda 1997; Jones *et al.* 2009;  
279 Ellner & Becks 2010; Jones & Gomulkiewicz 2012; Cortez 2016; Cortez 2018)) to incorporate  
280 evolution in  $M$  at a rate that equals the product of the total amount of additive heritable variation  
281 in body size (*i.e.*, the product of the total phenotypic variance,  $\sigma^2$ , and the narrow sense  
282 heritability,  $h^2$ ), and the selection gradient (*i.e.*, the change in fitness,  $F$ , with respect to a change  
283 in  $M$ , which represents the strength of selection acting on  $M$ ). Taken together, the equation  
284 controlling the change in  $M$  over time under these assumptions was:

$$285 \quad \frac{dM}{dt} = \sigma^2 h^2 \frac{\partial F(M)}{\partial M}, \quad \text{eq [3]}$$

286 were  $F(M) = \frac{1}{N} \frac{dN}{dt}$  (Lande 1976; Schreiber, Bürger & Bolnick 2011).

287 Last, the Plasticity + Eco-Evo Model assumes that both Supply-Demand (plastic) and  
288 Eco-Evo (rapid evolution) contributions can simultaneously influence the rate of change of  $M$ ,  
289 resulting in the following model for body size dynamics:

290 
$$\frac{dM}{dt} = \frac{eK}{N} - cM^\delta + \sigma^2 h^2 \frac{\partial F(M)}{\partial M}. \quad \text{eq [4]}$$

291 This model does not account for possible interplay between plastic and evolutionary change,  
292 such as plasticity facilitating evolution, plasticity impeding evolution, or evolving plasticity, all  
293 of which can occur and have been reviewed elsewhere (Diamond & Martin 2016).

294 None of our models accounts for shifts in age or size structure because here we were are  
295 specifically interested in mathematically tracking changes in mean body size, not changes in the  
296 entire trait distribution, which also requires model formulations that are not amenable to ODE  
297 fitting (Chen, Baños & Buceta 2018; Nieto-Acuña *et al.* 2019).

298

#### 299 *Model fitting, parameter uncertainty, and model selection*

300 We fitted the models in Eqs 1-4 to the *T. pyriformis* time series using R package FME  
301 v1.3.6.1 (Soetaert & Petzoldt 2010). However, non-linear model fitting tends to get stuck in sub-  
302 optimal maxima/minima during residual minimization (or similar procedures) and it is often  
303 impossible to simultaneously estimate all model parameters, in which case the model is said to  
304 be non-identifiable (Motulsky & Christopoulos 2004; Miao *et al.* 2011). The conversion  
305 parameters  $a$  and  $b$  of our models –which convert from units of  $M^\alpha$  and  $M^\gamma$  into units of  $r$  and  
306  $K$ , respectively– were not identifiable (i.e., the fitting procedure could not simultaneously  
307 estimate them and all other model parameters without yielding negative or other non-sensical  
308 parameter values). Because initial model fits suggested values close to 1 and -1 for the allometric  
309 parameter  $\alpha$  and  $\gamma$ , respectively, we estimated  $a$  and  $b$  from our data by solving  $aM^\alpha$  and  
310  $bM^\gamma$  using the observed intrinsic growth rates for the first two days of growth ( $r \sim 3.20$  day<sup>-1</sup>),  
311 the observed average  $K \sim 6400$  ind/mL, average  $M (\sim 10^4 \mu\text{m}^3)$  obtained from the FlowCam from  
312 day 0 to day 4, and setting  $\alpha = 1$  and  $\gamma = -1$ . Doing so resulted in initial parameter values of

313  $\sim 10^{-4}$  for  $a$  and  $\sim 10^7$  for  $b$ , which were then optimized during preliminary model fitting (i.e., the  
314 iterative process of providing initial parameter guesses and assessing model fit to increase the  
315 chance that the fitting procedure succeeds). Because parameters  $a$  and  $b$  do not play an important  
316 biological role –they convert units of body size (to the power of  $\alpha$  or  $\gamma$ ) into units of  $r$  or  $K$ –  
317 these parameters should not be expected to change across models, and were thus assumed to be  
318 equal for all models and set constant during model parameter and uncertainty estimation of all  
319 remaining parameters. Last, we assumed that the scaling parameter of the metabolic cost,  $\delta$ ,  
320 equaled 1, as has been shown to be the case for protists (DeLong *et al.* 2010), despite it being  
321 closer to  $\frac{3}{4}$  for metazoans (Gillooly *et al.* 2001; Brown *et al.* 2004; DeLong *et al.* 2010).

322 Fitting of ordinary differential equations in package FME relies on the Levenberg-  
323 Marquardt algorithm for parameter estimation, and a Metropolis-Hastings MCMC procedure for  
324 estimation of parameter uncertainty (Soetaert & Petzoldt 2010). Model comparison was done  
325 using Akaike Information Criterion (Burnham & Anderson 2002) as:

$$326 \quad AIC_i = 2k_i + n_N \ln (SSE_{i,N}) + n_M \ln (SSE_{i,M}) \quad , \quad \text{eq[4]}$$

327 where  $k_i$  is the number of parameters of model  $i$ ,  $n_N$  is the number of datapoints considered in  
328 the density time series,  $n_M$  is the number of datapoints considered in the body size time series,  
329  $SSE_{i,N}$  is the sum of squared errors of model  $i$  with respect to the density time series, and  $SSE_{i,M}$   
330 is the sum of squared errors of model  $i$  with respect to the body size time series. An AIC  
331 difference  $>2$  indicates that one model is significantly better than the alternative (Burnham &  
332 Anderson 2002). Akaike weights were calculated as  $e^{-0.5\Delta AIC}$ , where  $\Delta AIC = AIC_i -$   
333  $\min (AIC)$ . Weights are bound between 0 and 1 and models with larger weights can be  
334 interpreted as having larger relative likelihoods (Burnham & Anderson 2002). All data and code  
335 are available at [https://anonymous.4open.science/r/Tetra\\_Rapid\\_BodySize\\_Shifts-5FD7](https://anonymous.4open.science/r/Tetra_Rapid_BodySize_Shifts-5FD7).

336

## 337 RESULTS

### 338 *Time series analyses*

339 Tetrahymena abundances increased to carrying capacity roughly 4 days after microcosms  
340 where initialized (Fig 2a, Fig S1a). Body size increased over the first day, then decreased more  
341 or less continuously for 12-13 days (Fig 2b, Fig S1b). The CCM analysis showed large  
342 predictability values for densities using changes in body size as a predictor, but smaller  
343 predictability for body size using densities as the predictor (Fig 2c). The stronger effect of  
344 change in body size on density was found to be causal (sharp increase in predictability with  
345 library size and decrease in standard deviation, Fig 2c). The effect of density on body size  
346 seemed to only be weakly causal (slow convergence of predictability and little change in  
347 standard deviation, Fig 2c). This indicated that while changes in body size more strongly  
348 influenced density changes, both seemed to have at least some level of influence on each other.

349

### 350 *Experimental results*

351 Our density manipulation resulted in a roughly two-fold difference in density among  
352 experimental jars at Day 0 ( $p < 10^{-5}$ , Appendix Fig S2), while the manipulation of body size  
353 resulted in a 20% size difference in average body size among experimental jars ( $p < 10^{-8}$ ,  
354 Appendix Fig S3). A Tukey post-hoc test indicated no statistically significant differences in body  
355 size between high- and low-density jars at Day 0 ( $p = 0.15$ , Fig 3a), and no statistically significant  
356 differences in density between large- and small-size treatments at Day 0 ( $p = 0.64$ , Fig 3b).

357 Together, these results indicate that we correctly manipulated density and size while keeping the

358 other variable constant. Overall, density increased, and size decreased from Day 0 to Day 2  
359 (Table 1, Fig 3), consistent with trends observed in our time series (Fig 2).

360 The imposed initial differences in density and size resulted in significant interactions with  
361 time (Table 1, Fig 3), indicating significant reciprocal effects of size on density and of density on  
362 size. Consistent with results from our CCM analysis (Fig 2c), body size had a larger effect on  
363 density (in magnitude) than the other way around (Table 1). However, in standardized units  
364 (units of standard deviations, SD), it could be possible for the imposed initial difference in  
365 density to be smaller relative to that in size, which could have led to a smaller overall effect of  
366 density on size than the other way around. To control for that effect, we divided the observed  
367 effect size of density on body size by the imposed (standardized) initial differences in density  
368 between low- and high-density jars, and also divided the observed effect size of body size on  
369 density by the imposed (standardized) initial difference in body size between small and large size  
370 jars. The resulting number could then be interpreted as the magnitude of the effect the predictor  
371 variable had on the change observed in the response variable from Day 0 to Day 2 (in units of  
372 SD), per unit difference in the initial treatment (also in SD). This resulted in a standardized effect  
373 size of body size on density that, while much closer, was still larger in magnitude than that of the  
374 effect of density on size (in absolute values, density→size = 0.57, size→density = 0.64), still  
375 consistent with our CCM results.

376

### 377 *Mathematical models*

378 All models fitted the empirical data remarkably well (Fig 4, Table 2). MCMC chains  
379 converged for all fitted parameters (Appendix Fig S4-S9) and model parameters were free of  
380 correlations for 25 out of 31 total parameter pairs across the three models (except for  $\gamma$  and  $m$ ,



381 and c and e in the Plasticity Model,  $\alpha$  and  $m$  in the eco-evo model, and c, e and  $\sigma^2 h^2$ , in the  
382 Plasticity+Eco-Evo model, Fig S5, S7, and S9). The Plasticity and Plasticity+Eco-Evo Models fit  
383 the abundance data slightly better than the Eco-Evo Model (notice departures of Eco-Evo Model  
384 in the early time steps, Fig 4a, c, e), while the Plasticity and Eco-Evo Models fit the body size  
385 data better than the Plasticity + Eco-Evo Model (Fig 4b, d, f). All models arrived at very similar  
386 fitted values for model parameters they had in common (Table 2), indicating good agreement  
387 between them all. Consistent with the literature, all models identified the scaling of K and M,  $\gamma$ ,  
388 as a negative number close to  $-3/4$  (Table 2). However, all models identified the scaling between r  
389 and M,  $\alpha$ , as positive and close to 1 (Table 2), while the literature pins that value—across  
390 species—to  $-1/4$  (Savage *et al.* 2004).

391         Despite all models fitting the data well, model selection through AIC indicated very large  
392 differences in model likelihood, with the Plasticity Model being –by far– the most likely  
393 ( $AIC_{\text{weight}} \sim 1$  for the Plasticity Model, but effectively zero for the other two models, Table 2).  
394 The Plasticity + Eco-Evo Model was the least likely of all fitted models, perhaps owing to a  
395 larger number of model parameters, which are penalized by AIC (Table 2). This result thus  
396 suggests that the observed coupled density and body-size dynamics were mostly driven by  
397 plasticity, while rapid evolution or a combination of plasticity and rapid evolution are less likely  
398 to explain the observed dynamics.

399

## 400 DISCUSSION

401         Because of the myriad ecological consequences of body size (e.g. (Gillooly *et al.* 2001;  
402 Brown *et al.* 2004; DeLong *et al.* 2010)), it is important to understand how changes in body  
403 size—plastic or evolutionary—may influence, or be influenced by, ecological dynamics. We

404 show that changes in body size more strongly influence changes in density than the other way  
405 around (Fig 2c, 3b), but that density also influences changes in body size (Fig 2c, 3a). This  
406 suggests the existence of a (possibly asymmetric) feedback between the two. Additionally, a  
407 model that accounts for rapid plastic change in body size provides the most parsimonious  
408 explanation for the observed, coupled ecological and phenotypic dynamics (Fig 4, Table 2).  
409 Previous results indicated that phenotypic change often lags ecological change (e.g., (DeLong *et*  
410 *al.* 2016)) but that, under certain conditions, very rapid shifts in body size may precede important  
411 changes in ecological dynamics and can thus be used as early warning signals of state shifts  
412 (Clements and Ozgul 2015). Our results add to this literature by showing that phenotypic change  
413 not only occurs well within ecological timescales and responds to ecological dynamics, but may  
414 even causally influence those dynamics (Figs 2, 3).

415         Understanding the mechanisms of this possible feedback between size and density  
416 dynamics is central to gain insights as to how coupled eco-phenotypic dynamics may occur in  
417 the wild. In many unicellular organisms, cell growth (increase in body size) at the individual  
418 level and cell division are intimately intertwined: cells grow until a critical size is reached, which  
419 triggers DNA synthesis and eventual division (Baserga 1968). Larger cells are closer to the  
420 critical size threshold that triggers cell division (Jorgensen & Tyers 2004), leading to faster cell  
421 division (reproduction) in the next generation, which ultimately results in faster population  
422 growth. This link between size and cell division provides a possible explanation for why our  
423 results identify changes in size as important drivers of changes in density (Fig 2c, Fig 3). In line  
424 with this argument, all models predicted a positive relationship between body size and the  
425 intrinsic growth rate,  $r$  ( $\alpha \sim 1$ , Table 2). This result stands in contrast to empirical data across  
426 species and theoretical expectations, which show lower intrinsic growth rates for larger

427 organisms (or  $\alpha < 0$ , (Savage *et al.* 2004)). Within species, however, larger individuals typically  
428 reproduce more and die at lower rates (Peters 1983), leading to higher  $r$ , due to lower mortality  
429 and higher reproduction (Kingsolver & Huey 2008). This positive relationship between body size  
430 and the demographic processes that fuel intrinsic growth rates are well understood within species  
431 (Peters 1983; Kingsolver & Huey 2008) –emphasizing how inter-species and intra-species body  
432 size scaling may often differ (Rall *et al.* 2012)– but also providing a plausible mechanism  
433 through which changes in size may be causally influencing changes in density, as our results  
434 show.

435         On the flip side, cells can enter and exit the cell division cycle depending on internal and  
436 external cues, such as nutrient availability (Baserga 1968; Fukada *et al.* 2007). As the *T.*  
437 *pyriformis* population reaches carrying capacity, low resource levels likely cue cells to exit the  
438 cell division cycle, resulting, in turn, in stunted growth and reduced average body sizes (because  
439 cells grow to reproduce) thus providing a possible explanation as to how density may influence  
440 body size. If that is the case, then observed total standing phenotypic variation in our population  
441 should be largely non-heritable, as also suggested in a recent study (Jacob & Legrand 2021).  
442 Surprisingly, the Eco-Evolutionary and Plasticity + Eco-Evo Models support this idea, as they  
443 indicate that the total amount of standing heritable variation in body size is rather small ( $\sigma^2 h^2 =$   
444  $0.992$  with high confidence for the Eco-Evo model and  $\sigma^2 h^2 = 0.878$  for Plasticity + Eco-Evo  
445 although with very low confidence, Table 2). For comparison, the total amount of phenotypic  
446 variation (heritable or not) in our initial population was 94 (units of  $\mu\text{m}^3$  squared), so the  
447 heritable portion of that total phenotypic variation would be on the order of 1%. Shifts in *T.*  
448 *pyriformis* phenotype have also been shown to occur differentially across environmental  
449 conditions (DeLong *et al.* 2017; Weber de Melo *et al.* 2020), again suggesting the occurrence of

450 plasticity and very low heritability in this species, and providing support for the above  
451 mechanism of response of body size on density.

452         While the Eco-Evo and Plasticity + Eco-Evo Models were found to be less parsimonious,  
453 our results do not rule out the possibility of rapid evolution in this system. Indeed, plastic change  
454 often precedes evolutionary change and occurs mostly along the axes of variation with the largest  
455 amount of heritable variation (the classic evolutionary ‘path of least resistance’ (Lande 1976;  
456 Lande 1979; Lande & Arnold 1983)), thus setting the stage for evolution to occur along those  
457 axes (Noble, Radersma & Uller 2019). As we state in our methods, our current models do not  
458 account for such a scenario, which could very well be at play here. Indeed, despite low  
459 heritability, the less parsimonious Eco-Evo and Plasticity + Eco-Evo models suggest that short  
460 term selection imposed by density-dependence may be strong enough to consistently shift body  
461 size over time, which in turn influences population dynamics. Our own data indicate that *T.*  
462 *pyriformis* reproduces at a rate of 3.5-4 new individuals per individual per day. This extremely  
463 fast population growth may eventually allow for evolutionary change in body size—provided  
464 that selection is strong enough, because of low heritability—even if it lags behind plastic change  
465 (Chevin, Lande & Mace 2010; Fox *et al.* 2019).

466         Interestingly, neither water nor nutrients were replenished during our experiment; both  
467 were limited and were likely consistently lost from the system through sampling and respiration.  
468 This nutrient impoverishment should lead to a strong decline in carrying capacity over time.  
469 Such a decline was not, or was only very weakly, observed (Fig 4). However, shifting the focus  
470 from abundances to total biomass shows a different picture: biomass increased with abundance  
471 in the first few days, but then declined over time (Appendix Fig S10) likely due to density being  
472 roughly constant after day 4 but average body size declining consistently after day 2 (Fig 2b, Fig

473 4, Fig S10). As resources wane from the system, a rapid decline in nutrient concentration may  
474 therefore be selecting for smaller body size (Vanni *et al.* 2009), which results in lower total  
475 biomass, but also lower competition (through a reduction in metabolic needs associated with  
476 smaller size (Brown *et al.* 2004)), ultimately allowing the population to remain at very high  
477 densities despite waning resources and increasingly lower biomass. Our data thus suggest  
478 interesting ways in which a rapid plastic changes in body size may allow organisms to regulate  
479 population growth and density-dependent factors, even as nutrients become increasingly limited.

480

#### 481 *Caveats and concluding remarks*

482 Both the CCM and the experimental results agreed that changes in size had a larger effect  
483 on changes in density than the other way around (Fig 2c, Fig 3). Yet, they differed on how much  
484 stronger this effect of size on density is. This difference may be due to a couple of reasons. First,  
485 CCM infers the magnitude of causal effects of one variable on the other throughout the entire  
486 time series. It does not inform at what time, exactly, the effect of one variable is larger than the  
487 effect of the other variable (Sugihara *et al.* 2012). So, it could very well be that the effect of  
488 density is much larger in the first few days –when density changes the most– but then declines  
489 over time. Second, our manipulations of size and density likely cannot be extrapolated beyond  
490 the first few days of the ecological dynamics (Days 0 to 7), and those first few days coincide  
491 with the time span over which larger changes in density were observed. So, while the CCM may  
492 underestimate large, temporally localized effects of density (by looking at the entirety of the time  
493 series), our experimental work may be overestimating the overall effects of density (as it focuses  
494 on their possibly larger effects in the first few days of the dynamics) even though, taken together,  
495 both results agree qualitatively.

496           Because neither CCM nor the experimental work should be used to infer how the effect  
497 of size and density on one another may change over time, it is entirely possible, even likely, that  
498 both effects change in magnitude over time. This likely explains why, despite body size clearly  
499 having an effect on density (Fig 2, 3), density changed little after Day 6 while body size declined  
500 from Day 2 to Day 14 (Fig 2b). Indeed, as cells are cued into exiting the cell division cycle due  
501 to lack of nutrients, fewer and fewer of them remain reproductive and the proposed mechanism  
502 through which cell size may influence density (i.e., through its effect on reproduction) may  
503 decline as the population remains at high density and resource scarcity sets in. Taken together,  
504 while our results indicate the existence of a feedback between changes in size and changes in  
505 density, they also suggest the possibility that the magnitude –and perhaps even the direction of  
506 that feedback– may change over time, certainly a promising avenue for future research.

507           Overall, our study shows that feedbacks between rapid plastic change in body size and  
508 change in density are likely integral to the process of population growth itself. This study sheds  
509 light on the ecological and evolutionary constraints that regulate population growth and provides  
510 new insights about how organisms cope with the negative effects of density-dependence. Our  
511 results also emphasize the need to further study and understand the ecological consequences of  
512 rapid plastic phenotypic change (Yamamichi, Yoshida & Sasaki 2011; Tariel, Plénet & Luquet  
513 2020), as plasticity, particularly in body size, may play a crucial role in determining the fate of  
514 networks of species interactions in a warming world (Barbour & Gibert 2021; Jacob & Legrand  
515 2021).

516 Table 1: ANOVA results from experimental manipulations of density and size

|                   |                          | Standardized Estimates (95% C.I.) | p-val                       |
|-------------------|--------------------------|-----------------------------------|-----------------------------|
| <b>(a) Model</b>  | Body Size ~ Density*Time | —                                 | —                           |
| <b>Parameters</b> | Intercept                | 0.96 (0.76, 1.16)                 | <10 <sup>-16</sup>          |
|                   | Density (Low Density)    | -0.17 (-0.45, 0.12)               | 0.244                       |
|                   | Time                     | -2.21 (-2.49, -1.19)              | <10 <sup>-16</sup>          |
|                   | Density*Time             | 0.90 (0.51, 1.30)                 | <b>2.92*10<sup>-5</sup></b> |
| <b>(b) Model</b>  | Density ~ Body Size*Time | —                                 | —                           |
| <b>Parameters</b> | Intercept                | -0.63 (-0.82, -0.45)              | <10 <sup>-16</sup>          |
|                   | Density                  | -0.28 (-0.54, -0.02)              | <b>0.036</b>                |
|                   | Time                     | 2.13 (1.87, 2.39)                 | <10 <sup>-16</sup>          |
|                   | Body Size*Time           | -1.17 (-1.53, -0.80)              | <b>3.79*10<sup>-8</sup></b> |

517

518

519

520

521

522 Table 2: Parameter estimates, parameter uncertainty, and model selection for all fitted models.

|                                                                     |                             | <i>r</i><br>scaling<br>with<br>body<br>size<br>( $\alpha$ ) | <i>K</i><br>scaling<br>with<br>body<br>size<br>( $\gamma$ ) | Mortality<br>rate<br>( $m$ ) | Supply-<br>Demand<br>conversion<br>parameter<br>( $e$ ) | Supply-<br>Demand<br>loss<br>parameter<br>( $c$ ) | Heritable<br>Variation<br>( $\sigma^2 h^2$ ) |                       | Allometric<br>Intercept<br>for <i>r</i><br>( $a$ ) | Allometric<br>Intercept<br>for <i>K</i><br>( $b$ ) | <b>AIC</b><br>( $\Delta$ <b>AIC</b> ) | <b>AIC</b> <sub>weight</sub>            |
|---------------------------------------------------------------------|-----------------------------|-------------------------------------------------------------|-------------------------------------------------------------|------------------------------|---------------------------------------------------------|---------------------------------------------------|----------------------------------------------|-----------------------|----------------------------------------------------|----------------------------------------------------|---------------------------------------|-----------------------------------------|
| <b>(a)</b><br><b>Plasticity</b><br><b>Model</b>                     | Estimate                    | 1.022                                                       | -0.721                                                      | 0.969                        | 24.295                                                  | 0.087                                             | —                                            | Initial value         | $\sim 10^{-4}$                                     | $\sim 10^7$                                        | <b>3242.5</b><br><b>(0)</b>           | <b>~1</b>                               |
|                                                                     | 95%<br>Credible<br>Interval | (1.010,<br>1.023)                                           | (-0.735,<br>-0.720)                                         | (0.770,<br>0.991)            | (18.400,<br>26.714)                                     | (0.077,<br>0.091)                                 | —                                            | Post-<br>Optimization | $2.2 \cdot 10^{-4}$                                | $8.2 \cdot 10^6$                                   |                                       |                                         |
| <b>(b)</b><br><b>Eco-Evo</b><br><b>Model</b>                        | Estimate                    | 1.056                                                       | -0.748                                                      | 0.897                        | —                                                       | —                                                 | 0.922                                        | Initial value         | As above                                           | As above                                           | <b>3287.65</b><br><b>(+45.15)</b>     | <b><math>1.57 \cdot 10^{-10}</math></b> |
|                                                                     | 95%<br>Credible<br>Interval | (1.048,<br>1.064)                                           | (-0.753,<br>-0.743)                                         | (0.770,<br>1.026)            | —                                                       | —                                                 | (0.825,<br>1.193)                            | Post-<br>Optimization | As above                                           | As above                                           |                                       |                                         |
| <b>(c)</b><br><b>Plasticity</b><br><b>+ Eco-Evo</b><br><b>Model</b> | Estimate                    | 1.012                                                       | -0.726                                                      | 0.860                        | 24.394                                                  | 0.086                                             | 0.878                                        | Initial value         | As above                                           | As above                                           | <b>3301.2</b><br><b>(+58.72)</b>      | <b><math>1.77 \cdot 10^{-13}</math></b> |
|                                                                     | 95%<br>Credible<br>Interval | (1.008,<br>1.023)                                           | (-0.734,<br>-0.722)                                         | (0.766,<br>0.994)            | (14.603,<br>32.223)                                     | (0.073,<br>0.096)                                 | (-0.498,<br>0.384)                           | Post-<br>Optimization | As above                                           | As above                                           |                                       |                                         |

523

524

525

526

527



528 FIGURES

529

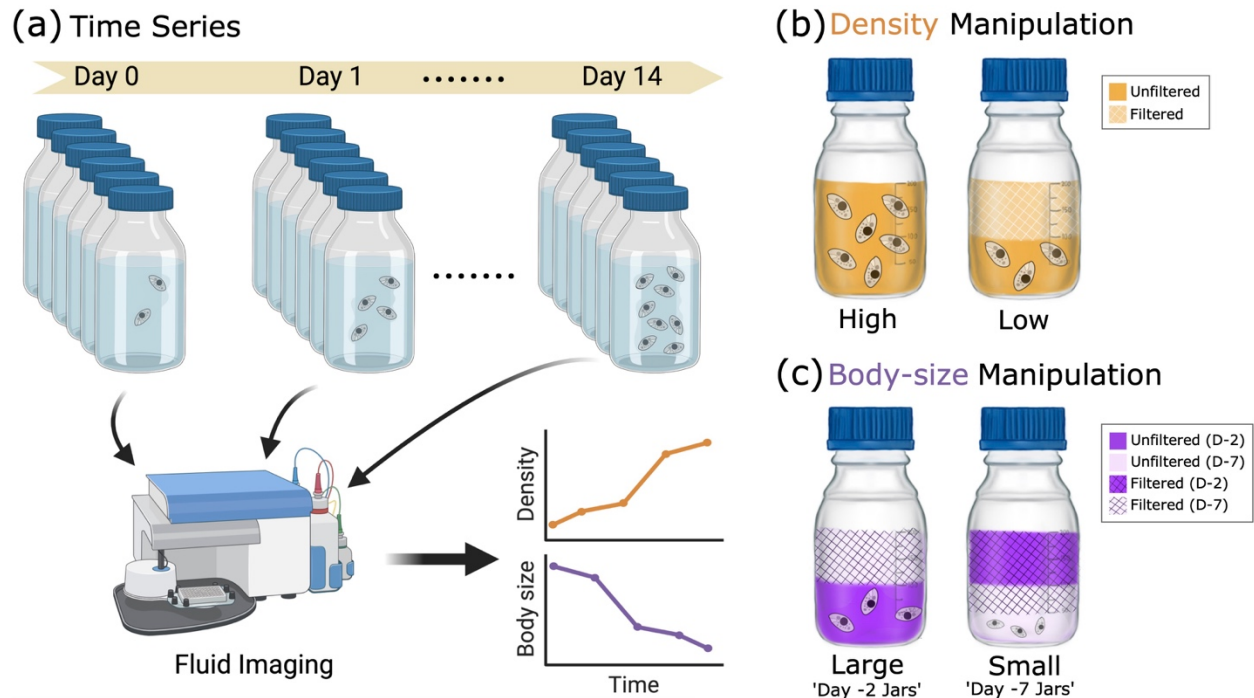

530

531 Fig 1: (a) Depiction of experimental procedure: microcosms were initialized at 10ind/mL and  
 532 each microcosm was replicated six times. Population density and cell size were recorded daily  
 533 for 14 days thereafter using fluid imaging. (b) Experimental setup to manipulate density while  
 534 controlling for body size. This involved filtering the Tetrahymena out of 100mL of media in half  
 535 of the experimental jars. (c) Experimental setup to manipulate body size while controlling for  
 536 density. This involved the filtration of 100mL of media of Day-2 (D-2) and Day-7 (D-7) jars,  
 537 which was then added to jars of the other group (ensuring equal resources and media). An extra  
 538 filtration step ensured that the density in 100mL of Day-2 jars equaled the density in 100mL of  
 539 Day-7 jars. To find the volume ( $x$ ) to be filtered from 100mL of unfiltered Day-7 media (then  
 540 returned to Day-7 jars), we noticed that  $Dens_{D-2} = Dens_{D-7}$  if  $\frac{Count_{D-2}}{Vol_{D-2}} = \frac{Count_{D-7}}{Vol_{D-7}}$ , and that  
 541  $Vol_{D-2} = 100mL$  and  $Vol_{D-7} = 100mL - x$ . Solving for  $x$  yielded how much volume had to  
 542 be filtered and returned to the same jars. This extra filtering step was done first and the filtrate  
 543 was set aside before the other two steps.

544

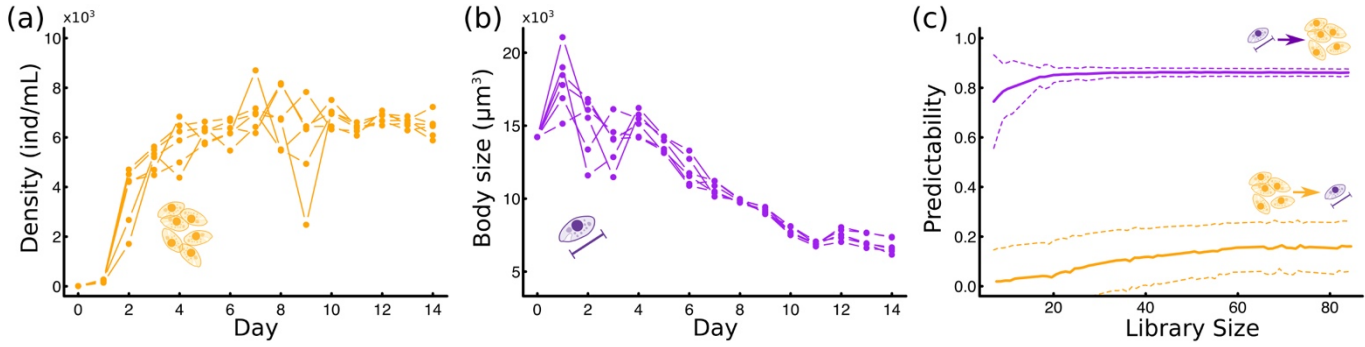

545 Fig 2: (a) Time series of Tetrahymena density. (b) Time series of mean Tetrahymena body size.  
546 (c) Convergent Cross Mapping predictability plot against library size (i.e., length of the time  
547 series used for analysis), using body size to predict density (purple) or density to predict body  
548 size (yellow), repeated 1000 times. Solid line indicates mean values and dashed lines indicate  
549 standard deviation of the mean.

550

551

552

553

554

555

556

557

558

559

560

561

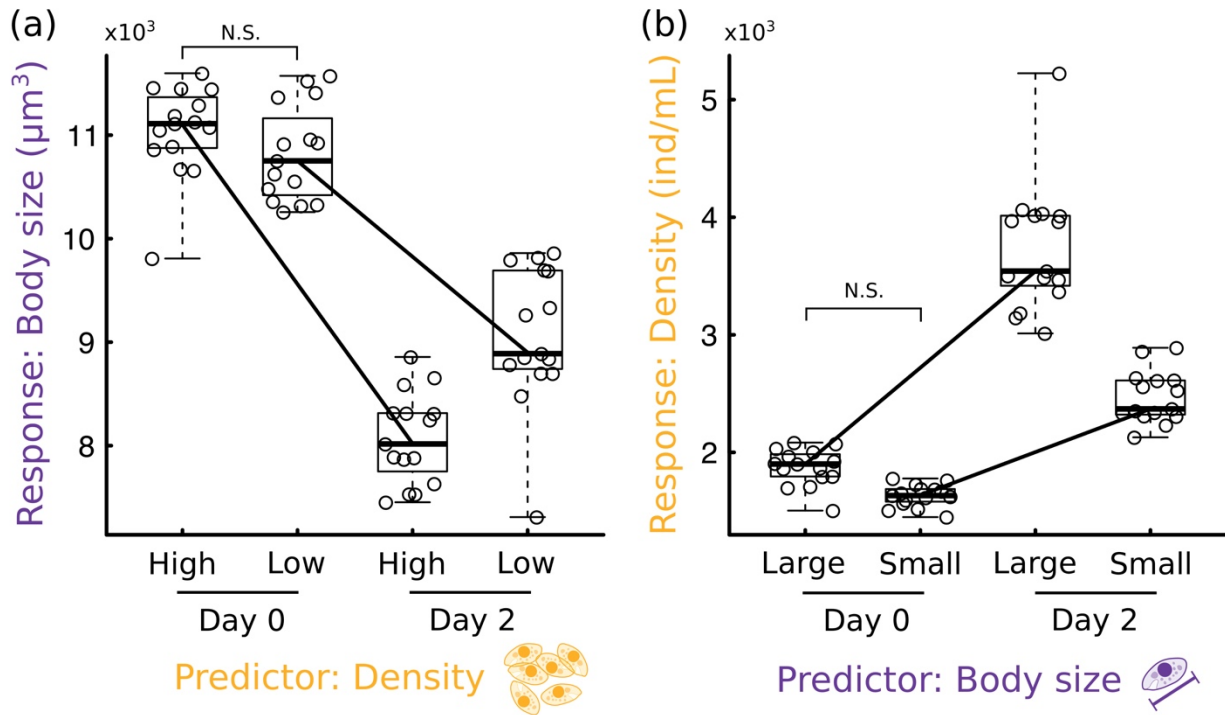

562

563 Fig 3: (a) Boxplot of the response of body size over two days across high- and low-density  
564 treatments. Solid black lines connecting the bodies of the boxplots are the to help see the  
565 interactive effect of the predictor variable and time. (b) Boxplot of the response of density over  
566 two days across large- and small-body-size treatments. Solid lines as in (b). N.S. indicates that  
567 the manipulation of density (a) and size (b) did not significantly alter the other (size in (a) and  
568 density in (b)) at Day 0.

569

570

571

572

573

574

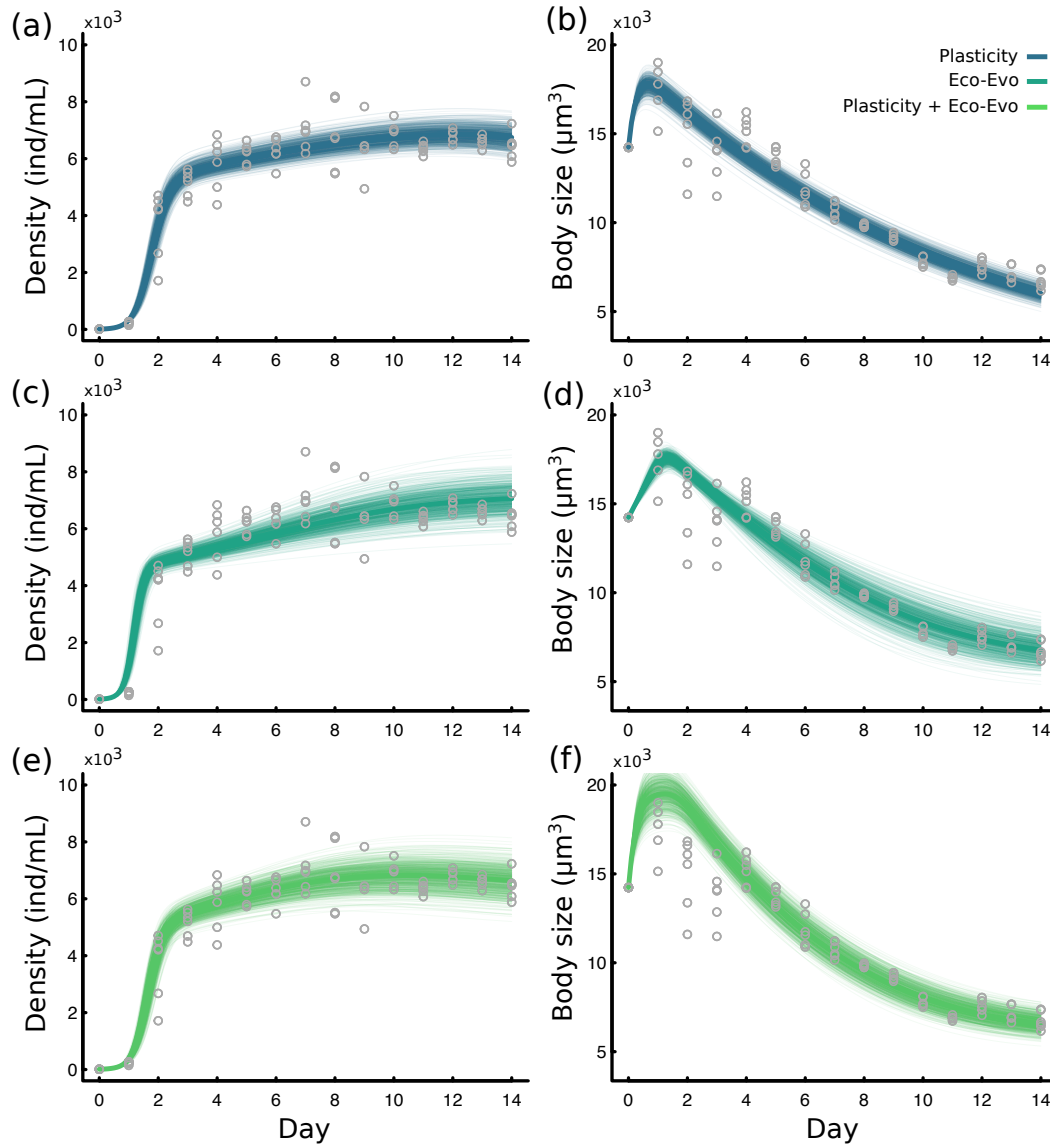

575

576 Fig 4: (a) Density data (grey points) and Plasticity Model fit (solid blue). Uncertainty is  
577 represented as 700 model predictions (transparent lines) whose parameters were sampled from  
578 posterior distributions for each model parameter, estimated during model fitting (Table 2). (b) As  
579 in (a), but for body size data. (c–d, e–f) As in (a–b) but for the Eco-Evo Model fit (c–d) or the  
580 Plasticity + Eco-Evo Model fit (e–f).

581

582

583

584

585 REFERENCES

- 586 Abrams, P.A. (1977) Density-Independent Mortality and Interspecific Competition: A Test of  
587 Pianka's Niche Overlap Hypothesis. *The American Naturalist*, **111**, 539-552.
- 588 Abrams, P.A., Harada, Y. & Matsuda, H. (1993) On the Relationship between Quantitative  
589 Genetic and Ess Models. *Evolution*, **47**, 982-985.
- 590 Abrams, P.A. & Matsuda, H. (1997) Prey Adaptation as a Cause of Predator-Prey Cycles.  
591 *Evolution*, **51**, 1742-1750.
- 592 Abreu, C.I., Friedman, J., Andersen Woltz, V.L. & Gore, J. (2019) Mortality causes universal  
593 changes in microbial community composition. *Nature Communications*, **10**, 2120.
- 594 Amarillo-Suarez, A.R., Stillwell, R.C. & Fox, C.W. (2011) Natural selection on body size is  
595 mediated by multiple interacting factors: a comparison of beetle populations varying  
596 naturally and experimentally in body size. *Ecology and Evolution*, **1**, 1-14.
- 597 Anderson-Teixeira, K.J., Vitousek, P.M. & Brown, J.H. (2008) Amplified temperature  
598 dependence in ecosystems developing on the lava flows of Mauna Loa , Hawai' i.  
599 *Proceedings of the National Academy of Sciences*, **105**, 228-233.
- 600 Barbour, M.A. & Gibert, J.P. (2021) Genetic and plastic rewiring of food webs under climate  
601 change. *Journal of Animal Ecology*.
- 602 Baserga, R. (1968) Biochemistry of the cell cycle: a review *Cell Tissue Kinetics*, **1**, 167-191.
- 603 Becks, L., Ellner, S.P., Jones, L.E. & Hairston, N.G. (2012) The functional genomics of an eco-  
604 evolutionary feedback loop: Linking gene expression, trait evolution, and community  
605 dynamics. *Ecology Letters*, **15**, 492-501.
- 606 Ben-Shachar, M., Lüdtke, D. & Makowski, D. (2020) effectsize: Estimation of Effect Size Indices  
607 and Standardized Parameters. *Journal of Open Source Software*, **5**.
- 608 Berlow, E.L., Dunne, J.A., Martinez, N.D., Stark, P.B., Williams, R.J. & Brose, U. (2009) Simple  
609 prediction of interaction strengths in complex food webs. *Proceedings of the National  
610 Academy of Sciences of the United States of America*, **106**, 187-191.
- 611 Brose, U., Jonsson, T., Berlow, E.L., Warren, P.H., Banasek-Richter, C., Bersier, L.-F., Blanchard,  
612 J.L., Brey, T., Carpenter, S.R., Cattin, M.-F., Cushing, L., Hassan, A.D., Dell, A.I., Edwards,  
613 F., Harper-Smith, S., Jacob, U., Ledger, M.E., Martinez, N.D., Memmott, J., Mintenbeck,  
614 K., Pinnegar, J.K., Rall, B.C., Rayner, T.S., Reuman, D.C., Ruess, L., Ulrich, W., Williams,  
615 R.J., Woodward, G. & Cohen, J.E. (2006) Consumer–resource body-size relationships in  
616 natural food webs. *Ecology*, **87**, 2411-2417.
- 617 Brown, J.H., Gillooly, J.F., Allen, A.P., Savage, V.M. & West, G.B. (2004) Toward a Metabolic  
618 Theory of Ecology. *Ecology*, **85**, 1771-1789.
- 619 Burnham, K.P. & Anderson, D.R. (2002) *Model selection and multimodel inference: A practical  
620 information-theoretic approach*, 2nd ed. edn. Springer Science, New York.
- 621 Cameron, M.D., Grant, V.H., Joly, K., Schmidt, J.H., Gustine, D.D., Mangipane, L.S., Mangipane,  
622 B. & Sorum, M.S. (2020) Body size plasticity in North American black and brown bears.  
623 *Ecosphere*, **e03235**, 1-11.
- 624 Chelini, M.C., DeLong, J.P. & Hebets, E.A. (2019) Ecophysiological determinants of sexual size  
625 dimorphism: integrating growth trajectories, environmental conditions, and metabolic  
626 rates. *Oecologia*, **191**, 61-71.

- 627 Chen, Y., Baños, R. & Buceta, J. (2018) A Markovian Approach towards Bacterial Size Control  
628 and Homeostasis in Anomalous Growth Processes. *Scientific Reports*, **8**, 9612.
- 629 Chevin, L.M., Lande, R. & Mace, G.M. (2010) Adaptation, plasticity, and extinction in a changing  
630 environment: towards a predictive theory. *PLoS Biology*, **8**, e1000357.
- 631 Clark, A.T., Ye, H., Isbell, F., Deyle, E.R., Cowles, J., Tilman, G.D. & Sugihara, G. (2015) Spatial  
632 convergent cross mapping to detect causal relationships from short time series. *Ecology*,  
633 **96**, 1174-1181.
- 634 Clements, C.F. & Ozigul, A. (2016) Including trait-based early warning signals helps predict  
635 population collapse. *Nature Communications*, **7**.
- 636 Cortez, M.H. (2016) How the Magnitude of Prey Genetic Variation Alters Predator-Prey Eco-  
637 Evolutionary Dynamics. *The American Naturalist*, **188**, 329-341.
- 638 Cortez, M.H. (2018) Genetic variation determines which feedbacks drive and alter predator-  
639 prey eco-evolutionary cycles. *Ecological Monographs*, **88**, 353-371.
- 640 Cox, S.L., Ruff, C.B., Maier, R.M. & Mathieson, I. (2019) Genetic contributions to variation in  
641 human stature in prehistoric Europe. *Proceedings of the National Academy of Sciences*,  
642 **116**, 21484-21492.
- 643 Damuth, J. (1981) Population density and body size in mammals. *Nature*, **290**, 699-700.
- 644 David, J.R., Legout, H. & Moreteau, B. (2006) Phenotypic plasticity of body size in a temperate  
645 population of *Drosophila melanogaster*: when the temperature-size rule does not apply.  
646 *Journal of genetics*, **85**, 9-23.
- 647 Davidowitz, G., Roff, D.A. & Nijhout, H.F. (2005) A Physiological Perspective on the Response of  
648 Body Size and Development Time to Simultaneous Directional Selection. *Integrative and*  
649 *Comparative Biology*, **45**, 525-532.
- 650 DeLong, J.P. (2012) Experimental demonstration of a 'rate – size' trade-off governing body size  
651 optimization. *Evolutionary Ecology Research*, **14**, 343-352.
- 652 DeLong, J.P. (2020) Detecting the Signature of Body Mass Evolution in the Broad-Scale  
653 Architecture of Food Webs. *The American Naturalist*, **196**, 443-453.
- 654 DeLong, J.P., Brassil, C.E., Erickson, E.K., Forbes, V.E., Moriyama, E. & Rieckhof, W.R. (2017)  
655 Dynamic thermal reaction norms and body size oscillations challenge explanations of  
656 the temperature–size rule. *Evolutionary Ecology Research*, **18**, 293-303.
- 657 DeLong, J.P., Forbes, V.E., Galic, N., Gibert, J.P., Laport, R.G., Phillips, J.S. & Vavra, J.M. (2016)  
658 How fast is fast? Eco-evolutionary dynamics and rates of change in populations and  
659 phenotypes. *Ecology and Evolution*, **6**, 573-581.
- 660 DeLong, J.P. & Gibert, J.P. (2016) Gillespie eco-evolutionary models (GEMs) reveal the role of  
661 heritable trait variation in eco-evolutionary dynamics. *Ecology and Evolution*, **6**, 935-  
662 945.
- 663 DeLong, J.P., Gilbert, B., Shurin, J.B., Savage, V.M., Barton, B.T., Clements, C.F., Dell, A.I., Greig,  
664 H.S., Harley, C.D.G., Kratina, P., McCann, K.S., Tunney, T.D., Vasseur, D.A. & O'Connor,  
665 M.I. (2015) The Body Size Dependence of Trophic Cascades. *The American Naturalist*,  
666 **185**, 354-366.
- 667 DeLong, J.P., Hanley, T.C. & Vasseur, D.A. (2014) Predator-prey dynamics and the plasticity of  
668 predator body size. *Functional Ecology*, **28**, 487-493.



- 669 DeLong, J.P., Okie, J.G., Moses, M.E., Sibly, R.M. & Brown, J.H. (2010) Shifts in metabolic scaling,  
670 production, and efficiency across major evolutionary transitions of life. *Proceedings of*  
671 *the National Academy of Sciences of the United States of America*, **107**, 12941-12945.
- 672 DeLong, J.P. & Walsh, M. (2015) The interplay between resource supply and demand  
673 determines the influence of predation on prey body size. *Canadian Journal of Fisheries*  
674 *and Aquatic Sciences*, **72**, 1-7.
- 675 Diamond, S.E. & Martin, R.A. (2016) The interplay between plasticity and evolution in response  
676 to human-induced environmental change. *F1000 Research*, **5**, 2835.
- 677 Dimond, K.L. & Zufall, R.A. (2016) Hidden genetic variation in the germline genome of  
678 *Tetrahymena thermophila*. *Journal of Evolutionary Biology*, **29**, 1284-1292.
- 679 Ellner, Stephen P. & Becks, L. (2010) Rapid prey evolution and the dynamics of two-predator  
680 food webs. *Theoretical Ecology*, 133-152.
- 681 Ellner, S.P., Geber, M.A. & Hairston, N.G. (2011) Does rapid evolution matter? Measuring the  
682 rate of contemporary evolution and its impacts on ecological dynamics. *Ecology Letters*,  
683 **14**, 603-614.
- 684 Fey, S.B., Gibert, J.P. & Siepielski, A.M. (2019) The consequences of mass mortality events for  
685 the structure and dynamics of biological communities. *Oikos*, 1-12.
- 686 Fox, R.J., Donelson, J.M., Schunter, C., Ravasi, T. & Gaitan-Espitia, J.D. (2019) Beyond buying  
687 time: the role of plasticity in phenotypic adaptation to rapid environmental change.  
688 *Philosophical Transactions of the Royal Society B: Biological Sciences*, **374**, 20180174.
- 689 Frickel, J., Sieber, M. & Becks, L. (2016) Eco-evolutionary dynamics in a coevolving host-virus  
690 system. *Ecology Letters*, **19**, 450-459.
- 691 Fukada, S., Uezumi, A., Ikemoto, M., Masuda, S., Segawa, M., Tanimura, N., Yamamoto, H.,  
692 Miyagoe-Suzuki, Y. & Takeda, S. (2007) Molecular signature of quiescent satellite cells in  
693 adult skeletal muscle. *Stem Cells*, **25**, 2448-2459.
- 694 Galloway, L.F. & Etersson, J.R. (2007) Transgenerational plasticity is adaptive in the wild. *Science*  
695 *(New York, N.Y.)*, **318**, 1134-1136.
- 696 Gavina, M.K.A., Tahara, T., Tainaka, K.I., Ito, H., Morita, S., Ichinose, G., Okabe, T., Togashi, T.,  
697 Nagatani, T. & Yoshimura, J. (2018) Multi-species coexistence in Lotka-Volterra  
698 competitive systems with crowding effects. *Scientific Reports*, **8**, 1198.
- 699 Gelman, A. (2008) Scaling regression inputs by dividing by two standard deviations. *Statistics in*  
700 *Medicine*, **27**, 2865-2873.
- 701 Ghosh, S.M., Testa, N.D. & Shingleton, A.W. (2013) Temperature-size rule is mediated by  
702 thermal plasticity of critical size in *Drosophila melanogaster*. *ZooKeys*, **298**.
- 703 Gibert, J.P. & DeLong, J.P. (2014) Temperature alters food web body-size structure. *Biology*  
704 *Letters*, **10**, 20140473-20140473.
- 705 Gibert, J.P. & Yeakel, J.D. (2019) Eco-Evolutionary Origins of Diverse Abundance , Biomass , and  
706 Trophic Structures in Food Webs. *Frontiers in Ecology and Evolution*, **7**, 1-11.
- 707 Gillooly, J.F., Brown, J.H., West, G.B., Savage, V.M. & Charnov, E.L. (2001) Effects of size and  
708 temperature on metabolic rate. *Science (New York, N.Y.)*, **293**, 2248-2251.
- 709 Glasheen, J. & McMahon, T. (1996) Size-dependence of water-running ability in basilisk lizards  
710 (*Basiliscus basiliscus*). *The Journal of Experimental Biology*, **199**, 2611-2618.

- 711 Gravel, D., Poisot, T., Albouy, C., Velez, L. & Mouillot, D. (2013) Inferring food web structure  
712 from predator-prey body size relationships. *Methods in Ecology and Evolution*, **4**, 1083-  
713 1090.
- 714 Hairston, N.G., Ellner, S.P., Geber, M.a., Yoshida, T., Fox, J.a., Hairston Jr, N.G., Ellner, S.P.,  
715 Geber, M.a., Yoshida, T. & Fox, J.a. (2005) Rapid evolution and the convergence of  
716 ecological and evolutionary time. *Ecology Letters*, **8**, 1114-1127.
- 717 Holt, R.D. (2008) Theoretical perspectives on resource pulses. *Ecology*, **89**, 671-681.
- 718 Hurlbert, A.H., Ballantyne IV, F. & Powell, S. (2008) Shaking a leg and hot to trot: the effects of  
719 body size and temperature on running speed in ants. *Ecological Entomology*, **33**, 144-  
720 154.
- 721 Huryn, A. & Benke, A. (2007) Relationship between biomass turnover and body size for stream  
722 communities *Body Size: The Structure and Function of Aquatic Ecosystems* (eds A.  
723 Hildrew, D. Raffaelli & R. Edmonds-Brown), pp. 55-76. Cambridge University Press  
724 Cambridge.
- 725 Jacob, S. & Legrand, D. (2021) Phenotypic plasticity can reverse the relative extent of intra- and  
726 interspecific variability across a thermal gradient. *Proceedings of the Royal Society B*,  
727 **288**, 20210428.
- 728 Jones, E.I. & Gomulkiewicz, R. (2012) Biotic interactions, rapid evolution, and the establishment  
729 of introduced species. *The American Naturalist*, **179**, E28-36.
- 730 Jones, L.E., Becks, L., Ellner, Stephen P., Hairston Jr, N.G., Yoshida, T. & Fussmann, G.F. (2009)  
731 Rapid contemporary evolution and clonal food web dynamics. *Philosophical transactions*  
732 *of the Royal Society of London. Series B, Biological sciences*, **364**, 1579-1591.
- 733 Jorgensen, P. & Tyers, M. (2004) How cells coordinate growth and division. *Current Biology*, **14**,  
734 R1014-1027.
- 735 Karakoç, C., Clark, A.T. & Chatzinotas, A. (2020) Diversity and coexistence are influenced by  
736 time-dependent species interactions in a predator-prey system. *Ecology Letters*, **23**, 983-  
737 993.
- 738 Kingsolver, J.G. & Huey, R.B. (2008) Size, temperature, and fitness: three rules. *Evolutionary*  
739 *Ecology Research*, **10**, 251-268.
- 740 Kondoh, M., Kawatsu, K., Osada, Y. & Ushio, M. (2020) Theoretical Ecology, concepts, and  
741 applications: A data-driven approach to complex ecological systems. *Theoretical*  
742 *Ecology, Concepts and Applications* (eds K.S. McCann & G. Gellner), pp. 117-133. Oxford  
743 University Press, Oxford.
- 744 Lafuente, E., Duneau, D. & Beldade, P. (2018) Genetic basis of thermal plasticity variation in  
745 *Drosophila melanogaster* body size. *PLoS Genetics*, **14**, e1007686.
- 746 Lande, R. (1976) Natural Selection and Random Genetic Drift in Phenotypic Evolution. *Evolution*,  
747 **30**, 314-334.
- 748 Lande, R. (1979) Quantitative genetic analysis of multivariate evolution, applied to brain: body  
749 size allometry. *Evolution*, **33**, 402-416.
- 750 Lande, R. & Arnold, S.J. (1983) The Measurement of Selection on Correlated Characters.  
751 *Evolution*, **37**, 1210-1226.
- 752 Lax, S., Abreu, C.I. & Gore, J. (2020) Higher temperatures generically favour slower-growing  
753 bacterial species in multispecies communities. *Nature Ecology and Evolution*.



- 754 Marañón, E., Cermeno, P., Lopez-Sandoval, D.C., Rodriguez-Ramos, T., Sobrino, C., Huete-  
755 Ortega, M., Blanco, J.M. & Rodriguez, J. (2013) Unimodal size scaling of phytoplankton  
756 growth and the size dependence of nutrient uptake and use. *Ecology Letters*, **16**, 371-  
757 379.
- 758 Miao, H., Xia, X., Perelson, A.S. & Wu, H. (2011) On Identifiability of Nonlinear Ode Models and  
759 Applications in Viral Dynamics. *SIAM Review*, **53**, 3-39.
- 760 Motulsky, H. & Christopoulos, A. (2004) *Fitting Models to Biological Data using Linear and*  
761 *Nonlinear Regression: A Practical Guide to Curve Fitting*. Oxford University Press, Oxford,  
762 UK.
- 763 Nguyen, J., Lara-Gutiérrez, J. & Stocker, R. (2020) Environmental fluctuations and their effects  
764 on microbial communities, populations, and individuals. *FEMS Microbiology Reviews*,  
765 **fuaa068**, 1-16.
- 766 Nieto-Acuña, C.A., Vargas-Garcia, C.A., Singh, A. & Pedraza, J.M. (2019) Efficient computation of  
767 stochastic cell-size transient dynamics. *BMC Bioinformatics*, **20**, 647.
- 768 Noble, D.W.A., Radersma, R. & Uller, T. (2019) Plastic responses to novel environments are  
769 biased towards phenotype dimensions with high additive genetic variation. *Proceedings*  
770 *of the National Academy of Sciences*, **116**, 13452-13461.
- 771 Pavković-Lučić, S. & Kekić, V. (2013) Developmental temperature, body size and male mating  
772 success in fruit flies, *Drosophila melanogaster* (Diptera : Drosophilidae). *European*  
773 *Journal of Entomology*, **110**, 31-37.
- 774 Peckarsky, B.L., Taylor, B.W., McIntosh, A.R., McPeck, Mark A. & Lytle, D.A. (2001) Variation in  
775 Mayfly Size at Metamorphosis as a Developmental Response to Risk of Predation.  
776 *Ecology*, **82**, 740-757.
- 777 Peters, R.H. (1983) *The Ecological Implications of Body Size*. Cambridge University Press,  
778 Cambridge, UK.
- 779 Preziosi, R.D. & Fairbairn, D.J. (2000) Lifetime selection on adult body size and components of  
780 body size in a waterstrider: opposing selection and maintenance of sexual size  
781 dimorphism. *Evolution*, **54**, 558-566.
- 782 Rall, B.C., Brose, U., Hartvig, M., Kalinkat, G., Schwarzmüller, F., Vucic-Pestic, O. & Petchey, O.L.  
783 (2012) Universal temperature and body-mass scaling of feeding rates. *Philosophical*  
784 *transactions of the Royal Society of London. Series B, Biological sciences*, **367**, 2923-  
785 2934.
- 786 Riede, J.O., Brose, U., Ebenman, B., Jacob, U., Thompson, R.M., Townsend, C.R. & Jonsson, T.  
787 (2011) Stepping in Elton's footprints: a general scaling model for body masses and  
788 trophic levels across ecosystems. *Ecology Letters*, **14**, 169-178.
- 789 Roach, D.a. & Wulff, R.D. (1987) Maternal Effects in Plants. *Annual Review of Ecology and*  
790 *Systematics*, **18**, 209-235.
- 791 Rogers, T.L., Munch, S.B., Stewart, S.D., Palkovacs, E.P., Giron-Nava, A., Matsuzaki, S.S. &  
792 Symons, C.C. (2020) Trophic control changes with season and nutrient loading in lakes.  
793 *Ecology Letters*, **23**, 1287-1297.
- 794 Rudman, S.M., Barbour, M.A., Csilléry, K., Gienapp, P., Guillaume, F., Hairston Jr, N.G., Hendry,  
795 A.P., Lasky, J.R., Rafajlović, M., Räsänen, K., Schmidt, P.S., Seehausen, O., Therkildsen,  
796 N.O., Turcotte, M.M. & Levine, J.M. (2018) What genomic data can reveal about eco-  
797 evolutionary dynamics. *Nature Ecology & Evolution*, **2**, 9-15.

- 798 Savage, V.M., Gillooly, J.F., Brown, J.H. & Charnov, E.L. (2004) Effects of body size and  
799 temperature on population growth. *The American Naturalist*, **163**, 429-441.
- 800 Schaffner, L.R., Govaert, L., De Meester, L., Ellner, S.P., Fairchild, E., Miner, B.E., Rudstam, L.G.,  
801 Spaak, P. & Hairston, N.G. (2019) Consumer-resource dynamics is an eco-evolutionary  
802 process in a natural plankton community. *Nature Ecology and Evolution*, **3**, 1351-1358.
- 803 Schreiber, S.J., Bürger, R. & Bolnick, D.I. (2011) The community effects of phenotypic and  
804 genetic variation within a predator population. *Ecology*, **92**, 1582-1593.
- 805 Soetaert, K. & Petzoldt, T. (2010) Inverse Modelling, Sensitivity and Monte Carlo Analysis in R  
806 Using Package FME. *Journal Of Statistical Software*, **33**, 1-28.
- 807 Sugihara, G., May, R., Ye, H., Hsieh, C.H., Deyle, E., Fogarty, M. & Munch, S. (2012) Detecting  
808 causality in complex ecosystems. *Science*, **338**, 496-500.
- 809 Sugihara, G. & May, R.M. (1990) Nonlinear forecasting as a way to distinguishing chaos from  
810 measurement error in time series. *Science*, **344**, 734-741.
- 811 Takens, F. (1981) Detecting strange attractors in turbulence. *Dynamical Systems and*  
812 *Turbulence*. Springer, Berlin, Heidelberg.
- 813 Tariel, J., Plénet, S. & Luquet, É. (2020) Transgenerational Plasticity in the Context of Predator-  
814 Prey Interactions. *Frontiers in Ecology and Evolution*, **8**.
- 815 Team, R.C. (2013) R: A language and environment for statistical computing. R Foundation for  
816 Statistical Computing, Vienna, Austria. R Foundation for Statistical Computing, Vienna,  
817 Austria.
- 818 terHorst, C.P., Miller, T.E. & Levitan, D.R. (2010) Evolution of prey in ecological time reduces the  
819 effect size of predators in experimental microcosms. *Ecology*, **91**, 629-636.
- 820 Thompson, J.N. (1998) Rapid evolution as an ecological process. *Trends in Ecology & Evolution*,  
821 **13**, 329-332.
- 822 Trebilco, R., Baum, J.K., Salomon, A.K. & Dulvy, N.K. (2013) Ecosystem ecology: size-based  
823 constraints on the pyramids of life. *Trends in Ecology & Evolution*, **28**, 423-431.
- 824 Vanni, M.J., Duncan, J.M., González, M.J. & Horgan, M.J. (2009) Competition Among Aquatic  
825 Organisms. *Encyclopedia of Inland Waters* (ed. G.E. Likens), pp. 395-404. Academic  
826 Press.
- 827 Walczyńska, A., Franch-Gras, L. & Serra, M. (2017) Empirical evidence for fast temperature-  
828 dependent body size evolution in rotifers. *Hydrobiologia*, **796**, 191-200.
- 829 Wasserman, S.S. & Mitter, C. (1978) The relationship of body size to breadth of diet in some  
830 Lepidoptera. *Ecological Entomology*, **3**, 155-160.
- 831 Weber de Melo, V., Lowe, R., Hurd, P.J. & Petchey, O.L. (2020) Phenotypic responses to  
832 temperature in the ciliate *Tetrahymena thermophila*. *Ecology and Evolution*, **10**, 7616-  
833 7626.
- 834 Wieczynski, D.J., Singla, P., Doan, A., Singleton, A., Han, Z.Y., Votzke, S., Yammine, A. & Gibert,  
835 J.P. (2021) Linking species traits and demography to explain complex temperature  
836 responses across levels of organization. *Proceedings of the National Academy of*  
837 *Sciences*, **118**.
- 838 Yamamichi, M., Yoshida, T. & Sasaki, A. (2011) Comparing the effects of rapid evolution and  
839 phenotypic plasticity on predator-prey dynamics. *The American Naturalist*, **178**, 287-  
840 304.

841 Yengo, L., Sidorenko, J., Kemper, K.E., Zheng, Z., Wood, A.R., Weedon, M.N., Frayling, T.M.,  
842 Hirschhorn, J., Yang, J., Visscher, P.M. & Consortium, G. (2018) Meta-analysis of  
843 genome-wide association studies for height and body mass index in approximately  
844 700000 individuals of European ancestry. *Human Molecular Genetics*, **27**, 3641-3649.  
845

846
